# Supplementary material for: Metabolomic Evaluation of the Quality of Leaf Lettuce Grown in Practical Plant Factory to Capture Metabolite Signature
Source: Front Plant Sci. 2018 Jun 27;9:665. doi: 10.3389/fpls.2018.00665 (PMC6030546; doi:10.3389/fpls.2018.00665)
Supplement: Supplementary file 4 [file Table_4.XLSX]

## Sheet: ST4
Supplementary Table 4. Specific metabolites in red fire (RF) lettuce leaves grown under hydroponic- and soil-cultivation.
No.	Analytical instrument	Metabolite	FDR	Log2FC	VIP	Excluded metabolite**
Var_247	LC-neg	Tryptophan	0.0420452	3.67996	1.42802
Var_71	GC	Phosphoric acid	0.0420452	3.5988	1.53575
Var_227	LC-neg	Tyrosine	0.0434459	3.25309	1.3706
Var_106	GC	Phenylalanine	0.0465292	3.2014	1.54492	**
Var_238	LC-neg	Phenylalanine	0.0434459	2.68663	1.55597
Var_129	GC	Lysine	0.0420452	2.26138	1.6005
Var_212	GC	Pyroglutamate	0.0420452	1.26331	1.41782
Var_31	GC	2-Propenoic acid	0.0456378	1.15344	1.38172
Var_213	GC	Glutamate	0.0434459	1.00487	1.2362
Var_112	GC	Suberic acid	0.0420452	-1.35459	1.16107
Var_234	LC-neg	Hydroxybenzoic acid	0.0480121	-1.36978	1.57705
Var_170	GC	1-Tetracosanol	0.0420452	-1.89864	1.61904
Var_277	LC-neg	Caffeoyltartaric-p-coumaroyl acid	0.0465292	-2.13043	1.2695
Var_132	GC	Inositol, myo-	0.0465292	-2.30913	1.43
Var_207	GC	Sitosterol, beta-	0.0465292	-2.35045	1.48135
Var_133	GC	Galactonic acid	0.0459906	-2.54709	1.44469
Var_150	GC	Cystine	0.0434459	-2.76797	1.61781
Var_184	GC	1-Hexacosanol	0.0420452	-3.22472	1.67049
Var_258	LC-neg	p-coumaroylquinic acid	0.0434459	-3.8009	1.27332
Var_76	GC	Glyceric acid	0.0465292	-3.80393	1.24181
Var_108	GC	Arabinose	0.0420452	-4.56606	1.46034
Var_215	GC	Sucrose	0.0420452	-4.7972	1.63084
Var_130	GC	Galacturonic acid	0.0420452	-6.34768	1.54086
**Excluded metabolites due to simultaneously detected by GC- and LC-MS analyses.
